# Supplementary material for: Potential deaths averted in USA by replacing cigarettes with e-cigarettes
Source: PubMed Central journal article supplement — Tob Control. 2017 Oct 2;27(1):18–25. doi: 10.1136/tobaccocontrol-2017-053759 (PMC5801653; doi:10.1136/tobaccocontrol-2017-053759), 2017-10-02
Supplement: tobaccocontrol-2017-053759supp002.pdf [file tobaccocontrol-2017-053759supp002.pdf]

**Table 1. Status Quo and Optimistic E-Cigarette Substitution (5% remain smokers after ten years) with Varying E-Cigarette Risks, The Same Initiation and Cessation Rate as in The Status Quo Scenario, Premature Deaths and Life Years Lost for All Cohorts, Males and Females**

| OUTCOME                                                                                                                                    | Year      |           |           |         |       | Cumulative<br>(2016-2100) | Deaths<br>Prevented/<br>Life Years<br>Gained* | % Change<br>relative to<br>status<br>quo |
|--------------------------------------------------------------------------------------------------------------------------------------------|-----------|-----------|-----------|---------|-------|---------------------------|-----------------------------------------------|------------------------------------------|
|                                                                                                                                            | 2016      | 2026      | 2060      | 2080    | 2100  |                           |                                               |                                          |
| <b>MALE</b>                                                                                                                                |           |           |           |         |       |                           |                                               |                                          |
| <b>Status Quo</b>                                                                                                                          |           |           |           |         |       |                           |                                               |                                          |
| Premature Deaths                                                                                                                           | 335,120   | 342,636   | 229,480   | 118,041 | 1,843 | 18,805,372                |                                               |                                          |
| Life Years Lost                                                                                                                            | 4,060,825 | 4,001,502 | 1,889,937 | 475,272 | 1,144 | 177,882,604               |                                               |                                          |
| <b>Excess risk of 2.5% with the same initiation and cessation rate as in the status quo scenario and 5% remain smokers after ten years</b> |           |           |           |         |       |                           |                                               |                                          |
| Premature Deaths                                                                                                                           | 335,120   | 273,147   | 164,928   | 34,741  | 213   | 13,830,405                | 4,974,967                                     | 26.5%                                    |
| Life Years Lost                                                                                                                            | 4,060,825 | 2,663,991 | 924,511   | 107,853 | 132   | 113,313,311               | 64,569,292                                    | 36.3%                                    |
| <b>Excess risk of 5% with the same initiation and cessation rate as in the status quo scenario and 5% remain smokers after ten years</b>   |           |           |           |         |       |                           |                                               |                                          |
| Premature Deaths                                                                                                                           | 335,120   | 275,067   | 166,775   | 36,798  | 259   | 13,969,904                | 4,835,468                                     | 25.7%                                    |
| Life Years Lost                                                                                                                            | 4,060,825 | 2,699,934 | 948,561   | 115,957 | 161   | 115,015,100               | 62,867,503                                    | 35.3%                                    |
| <b>Excess risk of 10% with the same initiation and cessation rate as in the status quo scenario and 5% remain smokers after ten years</b>  |           |           |           |         |       |                           |                                               |                                          |
| Premature Deaths                                                                                                                           | 335,120   | 278,883   | 170,361   | 40,776  | 347   | 14,241,674                | 4,563,698                                     | 24.3%                                    |
| Life Years Lost                                                                                                                            | 4,060,825 | 2,771,546 | 995,900   | 131,753 | 215   | 118,377,093               | 59,505,511                                    | 33.5%                                    |
| <b>Excess risk of 25% with the same initiation and cessation rate as in the status quo scenario and 5% remain smokers after ten years</b>  |           |           |           |         |       |                           |                                               |                                          |
| Premature Deaths                                                                                                                           | 335,120   | 290,147   | 180,326   | 51,680  | 568   | 15,003,375                | 3,801,997                                     | 20.2%                                    |
| Life Years Lost                                                                                                                            | 4,060,825 | 2,984,229 | 1,132,103 | 176,012 | 353   | 128,143,850               | 49,738,754                                    | 28.0%                                    |
| <b>Excess risk of 40% with the same initiation and cessation rate as in the status quo scenario and 5% remain smokers after ten years</b>  |           |           |           |         |       |                           |                                               |                                          |
| Premature Deaths                                                                                                                           | 335,120   | 301,142   | 189,250   | 61,203  | 740   | 15,693,399                | 3,111,974                                     | 16.5%                                    |
| Life Years Lost                                                                                                                            | 4,060,825 | 3,193,734 | 1,260,182 | 215,948 | 459   | 137,461,001               | 40,421,603                                    | 22.7%                                    |
| <b>Excess risk of 60% with the same initiation and cessation rate as in the status quo scenario and 5% remain smokers after ten years</b>  |           |           |           |         |       |                           |                                               |                                          |
| Premature Deaths                                                                                                                           | 335,120   | 315,401   | 199,804   | 72,059  | 907   | 16,518,261                | 2,287,111                                     | 12.2%                                    |
| Life Years Lost                                                                                                                            | 4,060,825 | 3,468,253 | 1,419,500 | 263,206 | 563   | 149,242,981               | 28,639,622                                    | 16.1%                                    |

| FEMALE                                                                                                                                     |           |           |         |         |       |            |            |       |
|--------------------------------------------------------------------------------------------------------------------------------------------|-----------|-----------|---------|---------|-------|------------|------------|-------|
| Status Quo                                                                                                                                 |           |           |         |         |       |            |            |       |
| Premature Deaths                                                                                                                           | 126,468   | 128,107   | 87,075  | 48,996  | 1,062 | 7,260,075  |            |       |
| Life Years Lost                                                                                                                            | 1,628,633 | 1,623,785 | 736,566 | 210,321 | 708   | 70,756,929 |            |       |
| <b>Excess risk of 2.5% with the same initiation and cessation rate as in the status quo scenario and 5% remain smokers after ten years</b> |           |           |         |         |       |            |            |       |
| Premature Deaths                                                                                                                           | 126,468   | 105,151   | 65,842  | 18,928  | 182   | 5,466,250  | 1,793,826  | 24.7% |
| Life Years Lost                                                                                                                            | 1,628,633 | 1,126,632 | 387,640 | 64,255  | 121   | 46,236,637 | 24,520,292 | 34.7% |
| <b>Excess risk of 5% with the same initiation and cessation rate as in the status quo scenario and 5% remain smokers after ten years</b>   |           |           |         |         |       |            |            |       |
| Premature Deaths                                                                                                                           | 126,468   | 105,765   | 66,468  | 19,600  | 200   | 5,514,385  | 1,745,691  | 24.0% |
| Life Years Lost                                                                                                                            | 1,628,633 | 1,139,831 | 396,824 | 67,341  | 133   | 46,890,479 | 23,866,450 | 33.7% |
| <b>Excess risk of 10% with the same initiation and cessation rate as in the status quo scenario and 5% remain smokers after ten years</b>  |           |           |         |         |       |            |            |       |
| Premature Deaths                                                                                                                           | 126,468   | 106,988   | 67,692  | 20,916  | 234   | 5,608,905  | 1,651,170  | 22.7% |
| Life Years Lost                                                                                                                            | 1,628,633 | 1,166,156 | 414,990 | 73,410  | 156   | 48,186,131 | 22,570,798 | 31.9% |
| <b>Excess risk of 25% with the same initiation and cessation rate as in the status quo scenario and 5% remain smokers after ten years</b>  |           |           |         |         |       |            |            |       |
| Premature Deaths                                                                                                                           | 126,468   | 110,627   | 71,152  | 24,640  | 328   | 5,879,321  | 1,380,754  | 19.0% |
| Life Years Lost                                                                                                                            | 1,628,633 | 1,244,549 | 467,951 | 90,833  | 218   | 51,980,002 | 18,776,926 | 26.5% |
| <b>Excess risk of 40% with the same initiation and cessation rate as in the status quo scenario and 5% remain smokers after ten years</b>  |           |           |         |         |       |            |            |       |
| Premature Deaths                                                                                                                           | 126,468   | 114,218   | 74,333  | 28,061  | 410   | 6,131,815  | 1,128,260  | 15.5% |
| Life Years Lost                                                                                                                            | 1,628,633 | 1,322,079 | 518,743 | 107,156 | 273   | 55,641,219 | 15,115,709 | 21.4% |
| <b>Excess risk of 60% with the same initiation and cessation rate as in the status quo scenario and 5% remain smokers after ten years</b>  |           |           |         |         |       |            |            |       |
| Premature Deaths                                                                                                                           | 126,468   | 118,930   | 78,206  | 32,213  | 505   | 6,444,020  | 816,055    | 11.2% |
| Life Years Lost                                                                                                                            | 1,628,633 | 1,424,127 | 583,373 | 127,364 | 336   | 60,330,663 | 10,426,265 | 14.7% |

\* Life Years gained = Life years lost in status quo - Life years lost in e-cigarette substitution scenario

**Table 2. Status Quo and Pessimistic E-Cigarette Substitution (10% remain smokers after ten years) with Varying E-Cigarette Risks, 150% Initiation and 50% Cessation Rate as in The Status Quo Scenario, Premature Deaths and Life Years Lost for All Cohorts, Males and Females**

| OUTCOME                                                                                                                                         | Year      |           |           |         |       | Cumulative<br>(2016-2100) | Deaths<br>Prevented/<br>Life Years<br>Gained* | % Change<br>relative<br>to status<br>quo |
|-------------------------------------------------------------------------------------------------------------------------------------------------|-----------|-----------|-----------|---------|-------|---------------------------|-----------------------------------------------|------------------------------------------|
|                                                                                                                                                 | 2016      | 2026      | 2060      | 2080    | 2100  |                           |                                               |                                          |
| <b>MALE</b>                                                                                                                                     |           |           |           |         |       |                           |                                               |                                          |
| <b>Status Quo</b>                                                                                                                               |           |           |           |         |       |                           |                                               |                                          |
| Premature Deaths                                                                                                                                | 335,120   | 342,636   | 229,480   | 118,041 | 1,843 | 18,805,372                |                                               |                                          |
| Life Years Lost                                                                                                                                 | 4,060,825 | 4,001,502 | 1,889,937 | 475,272 | 1,144 | 177,882,604               |                                               |                                          |
| <b>Excess risk of 2.5% with the 150% initiation and 50% cessation rate as in the status quo scenario and 10% remain smokers after ten years</b> |           |           |           |         |       |                           |                                               |                                          |
| Premature Deaths                                                                                                                                | 335,120   | 317,502   | 178,610   | 49,576  | 433   | 15,346,242                | 3,459,130                                     | 18.4%                                    |
| Life Years Lost                                                                                                                                 | 4,060,825 | 3,407,263 | 1,153,048 | 173,610 | 269   | 135,636,176               | 42,246,428                                    | 23.7%                                    |
| <b>Excess risk of 5% with the 150% initiation and 50% cessation rate as in the status quo scenario and 10% remain smokers after ten years</b>   |           |           |           |         |       |                           |                                               |                                          |
| Premature Deaths                                                                                                                                | 335,120   | 318,304   | 181,296   | 52,584  | 526   | 15,508,631                | 3,296,741                                     | 17.5%                                    |
| Life Years Lost                                                                                                                                 | 4,060,825 | 3,424,886 | 1,186,507 | 186,898 | 326   | 137,379,994               | 40,502,610                                    | 22.8%                                    |
| <b>Excess risk of 10% with the 150% initiation and 50% cessation rate as in the status quo scenario and 10% remain smokers after ten years</b>  |           |           |           |         |       |                           |                                               |                                          |
| Premature Deaths                                                                                                                                | 335,120   | 319,896   | 186,490   | 58,332  | 694   | 15,822,006                | 2,983,366                                     | 15.9%                                    |
| Life Years Lost                                                                                                                                 | 4,060,825 | 3,460,031 | 1,252,281 | 212,632 | 431   | 140,814,080               | 37,068,524                                    | 20.8%                                    |
| <b>Excess risk of 25% with the 150% initiation and 50% cessation rate as in the status quo scenario and 10% remain smokers after ten years</b>  |           |           |           |         |       |                           |                                               |                                          |
| Premature Deaths                                                                                                                                | 335,120   | 324,590   | 200,767   | 73,623  | 1,087 | 16,679,103                | 2,126,269                                     | 11.3%                                    |
| Life Years Lost                                                                                                                                 | 4,060,825 | 3,564,691 | 1,440,892 | 283,491 | 675   | 150,709,077               | 27,173,527                                    | 15.3%                                    |
| <b>Excess risk of 40% with the 150% initiation and 50% cessation rate as in the status quo scenario and 10% remain smokers after ten years</b>  |           |           |           |         |       |                           |                                               |                                          |
| Premature Deaths                                                                                                                                | 335,120   | 329,168   | 213,353   | 86,367  | 1,350 | 17,428,433                | 1,376,939                                     | 7.3%                                     |
| Life Years Lost                                                                                                                                 | 4,060,825 | 3,668,208 | 1,617,397 | 345,703 | 838   | 160,038,607               | 17,843,996                                    | 10.0%                                    |
| <b>Excess risk of 60% with the 150% initiation and 50% cessation rate as in the status quo scenario and 10% remain smokers after ten years</b>  |           |           |           |         |       |                           |                                               |                                          |
| Premature Deaths                                                                                                                                | 335,120   | 335,106   | 227,984   | 100,126 | 1,559 | 18,290,613                | 514,759                                       | 2.7%                                     |
| Life Years Lost                                                                                                                                 | 4,060,825 | 3,804,496 | 1,835,802 | 416,910 | 968   | 171,687,830               | 6,194,773                                     | 3.5%                                     |

| FEMALE                                                                                                                                          |           |           |         |         |       |            |            |       |
|-------------------------------------------------------------------------------------------------------------------------------------------------|-----------|-----------|---------|---------|-------|------------|------------|-------|
| Status Quo                                                                                                                                      |           |           |         |         |       |            |            |       |
| Premature Deaths                                                                                                                                | 126,468   | 128,107   | 87,075  | 48,996  | 1,062 | 7,260,075  |            |       |
| Life Years Lost                                                                                                                                 | 1,628,633 | 1,623,785 | 736,566 | 210,321 | 708   | 70,756,929 |            |       |
| <b>Excess risk of 2.5% with the 150% initiation and 50% cessation rate as in the status quo scenario and 10% remain smokers after ten years</b> |           |           |         |         |       |            |            |       |
| Premature Deaths                                                                                                                                | 126,468   | 126,351   | 74,197  | 27,675  | 377   | 6,379,736  | 880,340    | 12.1% |
| Life Years Lost                                                                                                                                 | 1,628,633 | 1,569,467 | 523,122 | 106,592 | 251   | 60,230,145 | 10,526,784 | 14.9% |
| <b>Excess risk of 5% with the 150% initiation and 50% cessation rate as in the status quo scenario and 10% remain smokers after ten years</b>   |           |           |         |         |       |            |            |       |
| Premature Deaths                                                                                                                                | 126,468   | 126,404   | 75,004  | 28,742  | 420   | 6,426,608  | 833,468    | 11.5% |
| Life Years Lost                                                                                                                                 | 1,628,633 | 1,571,055 | 535,619 | 112,275 | 280   | 60,761,787 | 9,995,142  | 14.1% |
| <b>Excess risk of 10% with the 150% initiation and 50% cessation rate as in the status quo scenario and 10% remain smokers after ten years</b>  |           |           |         |         |       |            |            |       |
| Premature Deaths                                                                                                                                | 126,468   | 126,508   | 76,588  | 30,802  | 500   | 6,517,851  | 742,224    | 10.2% |
| Life Years Lost                                                                                                                                 | 1,628,633 | 1,574,228 | 560,356 | 123,378 | 333   | 61,812,756 | 8,944,172  | 12.6% |
| <b>Excess risk of 25% with the 150% initiation and 50% cessation rate as in the status quo scenario and 10% remain smokers after ten years</b>  |           |           |         |         |       |            |            |       |
| Premature Deaths                                                                                                                                | 126,468   | 126,819   | 81,116  | 36,433  | 696   | 6,773,070  | 487,006    | 6.7%  |
| Life Years Lost                                                                                                                                 | 1,628,633 | 1,583,725 | 632,584 | 154,687 | 464   | 64,871,171 | 5,885,757  | 8.3%  |
| <b>Excess risk of 40% with the 150% initiation and 50% cessation rate as in the status quo scenario and 10% remain smokers after ten years</b>  |           |           |         |         |       |            |            |       |
| Premature Deaths                                                                                                                                | 126,468   | 127,129   | 85,335  | 41,339  | 838   | 7,003,632  | 256,444    | 3.5%  |
| Life Years Lost                                                                                                                                 | 1,628,633 | 1,593,191 | 701,990 | 183,223 | 558   | 67,796,596 | 2,960,333  | 4.2%  |
| <b>Excess risk of 60% with the 150% initiation and 50% cessation rate as in the status quo scenario and 10% remain smokers after ten years</b>  |           |           |         |         |       |            |            |       |
| Premature Deaths                                                                                                                                | 126,468   | 127,540   | 90,537  | 46,933  | 969   | 7,278,587  | -18,512    | -0.3% |
| Life Years Lost                                                                                                                                 | 1,628,633 | 1,605,763 | 790,461 | 217,405 | 646   | 71,507,813 | -750,885   | -1.1% |

\* Life Years gained = Life years lost in status quo - Life years lost in e-cigarette substitution scenario
